# Supplementary material for: Unidirectional transport of water nanodroplets entrapped inside a nonparallel smooth surface: a molecular dynamics simulation study
Source: Royal Society of Chemistry journal article supplement (doi:10.1039/c9ra08968c), 2019-01-01
Supplement: c9ra08968c2.pdf [file c9ra08968c2.pdf]

## Supplementary Information

# Unidirectional Transport of Water Nanodroplet Entrapped inside Nonparallel Smooth Surface: A Molecular Dynamics Simulation Study

*Awais Mahmood,<sup>†</sup> Shuai Chen,<sup>‡</sup> Lei Chen,<sup>†</sup> Dong Liu,<sup>†</sup> Chaolang Chen,<sup>†</sup> Ding Weng,<sup>†</sup> and*

*Jiadao Wang<sup>†\*</sup>*

<sup>†</sup>State Key Laboratory of Tribology, Tsinghua University, Beijing, 100084, China

<sup>‡</sup>Institute of High Performance Computing, A\*STAR, 138632, Singapore

### **Corresponding Author**

\*E-mail: [jdwang@mail.tsinghua.edu.cn](mailto:jdwang@mail.tsinghua.edu.cn). Tel: +86-010-62796458.

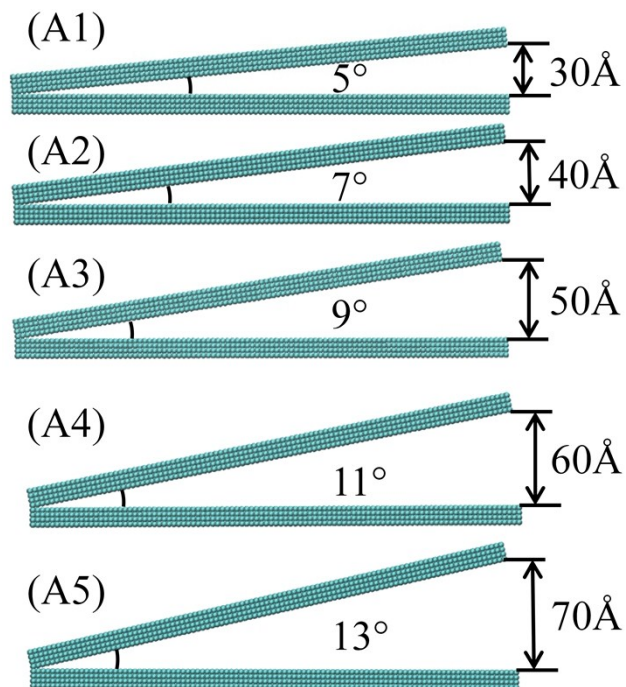

**Figure S1:** Different types of NPS with different surface angle ( $\theta$ ) and separation distance (S).

**Table S1:** Table containing information about the surface angle ( $\theta$ ) and separation distance (S) of different types of NPS.

| Type of NPS | Surface Angle " $\theta$ "<br>( $^{\circ}$ ) | Separation Distance " $S$ "<br>( $\text{\AA}$ ) |
|-------------|----------------------------------------------|-------------------------------------------------|
| A1          | 5                                            | 30                                              |
| A2          | 7                                            | 40                                              |
| A3          | 9                                            | 50                                              |
| A4          | 11                                           | 60                                              |
| A5          | 13                                           | 70                                              |

**Table S2:** Table containing information about the effect of surface energy on water bridge formation between two NPSs containing 3000, 4000, 5000 and 6000 molecules.

| Surface Energy (meV) | Type of NPS                                        |           |           |           |           |
|----------------------|----------------------------------------------------|-----------|-----------|-----------|-----------|
|                      | Bridge Formation (for 3000 water molecule droplet) |           |           |           |           |
|                      | <b>A1</b>                                          | <b>A2</b> | <b>A3</b> | <b>A4</b> | <b>A5</b> |
| <b>7.5</b>           | Yes                                                | Yes       | Yes       | Yes       | No        |
| <b>17.5</b>          | Yes                                                | Yes       | Yes       | No        | No        |
| <b>27.5</b>          | Yes                                                | Yes       | No        | No        | No        |
| <b>37.5</b>          | Yes                                                | Yes       | No        | No        | No        |
| Surface Energy (meV) | Type of NPS                                        |           |           |           |           |
|                      | Bridge Formation (for 4000 water molecule droplet) |           |           |           |           |
|                      | <b>A1</b>                                          | <b>A2</b> | <b>A3</b> | <b>A4</b> | <b>A5</b> |
| <b>7.5</b>           | Yes                                                | Yes       | Yes       | Yes       | Yes       |
| <b>17.5</b>          | Yes                                                | Yes       | Yes       | Yes       | No        |
| <b>27.5</b>          | Yes                                                | Yes       | No        | No        | No        |
| <b>37.5</b>          | Yes                                                | Yes       | No        | No        | No        |
| Surface Energy (meV) | Type of NPS                                        |           |           |           |           |
|                      | Bridge Formation (for 5000 water molecule droplet) |           |           |           |           |
|                      | <b>A1</b>                                          | <b>A2</b> | <b>A3</b> | <b>A4</b> | <b>A5</b> |
| <b>7.5</b>           | Yes                                                | Yes       | Yes       | Yes       | Yes       |
| <b>17.5</b>          | Yes                                                | Yes       | Yes       | Yes       | No        |
| <b>27.5</b>          | Yes                                                | Yes       | Yes       | No        | No        |
| <b>37.5</b>          | Yes                                                | Yes       | No        | No        | No        |
| Surface Energy (meV) | Type of NPS                                        |           |           |           |           |
|                      | Bridge Formation (for 6000 water molecule droplet) |           |           |           |           |
|                      | <b>A1</b>                                          | <b>A2</b> | <b>A3</b> | <b>A4</b> | <b>A5</b> |
| <b>7.5</b>           | Yes                                                | Yes       | Yes       | Yes       | Yes       |
| <b>17.5</b>          | Yes                                                | Yes       | Yes       | Yes       | No        |
| <b>27.5</b>          | Yes                                                | Yes       | Yes       | No        | No        |
| <b>37.5</b>          | Yes                                                | Yes       | No        | No        | No        |

**Table S3:** Table containing information about the effect of surface energy on water contact angle on flat surface and its respective interaction with the solid surface.

| Surface Energy (meV) | Water Contact Angle (°) | Interaction Energy (meV/molecule) |
|----------------------|-------------------------|-----------------------------------|
| 7.5                  | 110.4                   | -3.132                            |
| 17.5                 | 83.5                    | -8.704                            |
| 27.5                 | 64.3                    | -15.477                           |
| 37.5                 | 40.2                    | -25.708                           |
